# Supplementary material
Source: PubMed Central journal article supplement (PMC6557425)

## SUPPLEMENTAL MATERIAL

**Full Title:** Epidemiology of Cardiac Amyloidosis Associated Heart Failure Hospitalizations Among Fee-for-Service Medicare Beneficiaries in the United States

### Appendix

#### **ICD-9 Codes for Systemic Amyloidosis**

277.3x

#### **ICD-9 Codes for Heart Failure and Cardiomyopathy**

398.91, 402.01, 402.11, 402.91, 404.01, 404.11, 404.91, 404.03, 404.13, 404.93, 425.4, 425.7, 425.18, 425.8, 425.9, 428.0, 428.1, 428.20, 428.21, 428.22, 428.23, 428.30, 428.31, 428.32, 428.33, 428.40, 428.41, 428.42, 428.43, 428.9

### Supplementary Figure 1

#### Prevalence Cohort

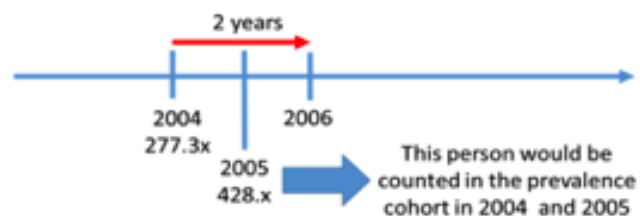

## Supplementary Figure 2

### Incidence Cohort

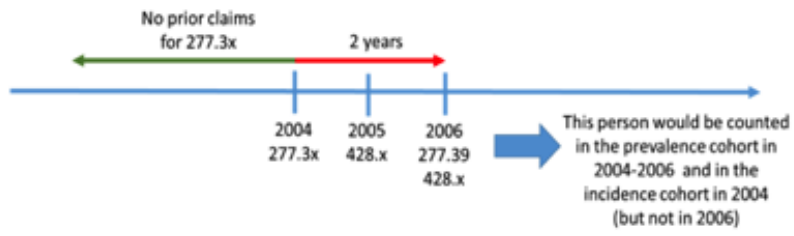

Supplement: NIHMS1528632-supplement-Supplemental_Material.pdf [file NIHMS1528632-supplement-Supplemental_Material.pdf]
